# Supplementary material
Source: PubMed Central journal article supplement (PMC3497367)
Supplement: AEM.02272-12_zam999103892so1.pdf [file AEM.02272-12_zam999103892so1.pdf]

| Serovar (# of isolates)      | ID by PCR-MS (serovar level) | # other serovars at same confidence level | # Primer pairs matching in database (out of 6) |
|------------------------------|------------------------------|-------------------------------------------|------------------------------------------------|
| Top-40                       |                              |                                           |                                                |
| <b>Typhimurium (9)</b>       | <b>Typhimurium</b>           | <b>1</b>                                  | <b>6</b>                                       |
| Enteritidis                  | Mbandaka                     | 3                                         | 5                                              |
| Enteritidis (2)              | Dublin                       | 0                                         | 6                                              |
| <b>Enteritidis (5)</b>       | <b>Enteritidis</b>           | <b>3</b>                                  | <b>6</b>                                       |
| <b>Newport (8)</b>           | <b>Newport</b>               | <b>0</b>                                  | <b>6</b>                                       |
| <b>Heidelberg (3)</b>        | <b>Heidelberg</b>            | <b>2</b>                                  | <b>6</b>                                       |
| <b>Javiana (7)</b>           | <b>Javiana</b>               | <b>1</b>                                  | <b>5</b>                                       |
| <b>Typhimurium var 5 (7)</b> | <b>Typhimurium</b>           | <b>1</b>                                  | <b>6</b>                                       |
| <b>Montevideo (6)</b>        | <b>Montevideo</b>            | <b>3</b>                                  | <b>6</b>                                       |
| <b>Muenchen (2)</b>          | <b>Muenchen</b>              | <b>1</b>                                  | <b>5</b>                                       |
| Oranienburg                  | Chester                      | 1                                         | 4                                              |
| Oranienburg (2)              | Reading                      | 1                                         | 4                                              |
| <b>Oranienburg (4)</b>       | <b>Oranienburg</b>           | <b>10</b>                                 | <b>6</b>                                       |
| Saintpaul                    | Heidelberg                   | 2                                         | 6                                              |
| <b>Saintpaul (5)</b>         | <b>Saintpaul</b>             | <b>2</b>                                  | <b>6</b>                                       |
| Infantis                     | Dublin                       | 2                                         | 4                                              |
| Infantis                     | Heidelberg                   | 4                                         | 4                                              |
| Infantis                     | Typhesius                    | 1                                         | 4                                              |
| Infantis                     | Bareilly                     | 0                                         | 6                                              |
| <b>Infantis (4)</b>          | <b>Infantis</b>              | <b>0</b>                                  | <b>6</b>                                       |
| Thompson                     | Gaminara                     | 10                                        | 6                                              |
| <b>Thompson (2)</b>          | <b>Thompson</b>              | <b>1</b>                                  | <b>6</b>                                       |
| Thompson (6)                 | Choleraesuis                 | 3                                         | 5                                              |
| Braenderup (3)               | Braenderup                   | 0                                         | 6                                              |
| <b>Agona (6)</b>             | <b>Agona</b>                 | <b>1</b>                                  | <b>6</b>                                       |
| <b>Hadar (4)</b>             | <b>Hadar</b>                 | <b>1</b>                                  | <b>6</b>                                       |
| <b>Paratyphi B (6)</b>       | <b>Paratyphi B</b>           | <b>1</b>                                  | <b>6</b>                                       |
| <b>Poona (4)</b>             | <b>Poona</b>                 | <b>0</b>                                  | <b>6</b>                                       |
| <b>Stanley (6)</b>           | <b>Stanley</b>               | <b>1</b>                                  | <b>6</b>                                       |
| <b>Anatum (7)</b>            | <b>Anatum</b>                | <b>1</b>                                  | <b>6</b>                                       |
| <b>Bareilly (6)</b>          | <b>Bareilly</b>              | <b>0</b>                                  | <b>6</b>                                       |
| Mbandaka                     | Muenchen                     | 1                                         | 4                                              |
| Mbandaka                     | Reading                      | 1                                         | 6                                              |
| Mbandaka (3)                 | Senftenberg                  | 0                                         | 4                                              |
| Mbandaka (3)                 | Newport                      | 0                                         | 4                                              |
| Paratyphi B                  | Thompson                     | 1                                         | 5                                              |
| <b>Paratyphi B (6)</b>       | <b>Paratyphi B</b>           | <b>0</b>                                  | <b>6</b>                                       |
| Hartford                     | Muenchen                     | 1                                         | 5                                              |
| <b>Panama (3)</b>            | <b>Panama</b>                | <b>2</b>                                  | <b>6</b>                                       |
| <b>Derby (5)</b>             | <b>Derby</b>                 | <b>0</b>                                  | <b>6</b>                                       |
| Derby                        | Anatum                       | 1                                         | 6                                              |
| Litchfield                   | Sloterdijk                   | 1                                         | 4                                              |
| Schwarzengrund               | Paratyphi B                  | 1                                         | 6                                              |
| <b>Schwarzengrund (4)</b>    | <b>Schwarzengrund</b>        | <b>10</b>                                 | <b>6</b>                                       |

|                        |                    |           |          |
|------------------------|--------------------|-----------|----------|
| <b>Senftenberg (7)</b> | <b>Senftenberg</b> | <b>10</b> | <b>6</b> |
| <b>Brandenburg (2)</b> | <b>Brandenburg</b> | <b>10</b> | <b>6</b> |
| Sandiego               | Gaminara           | 10        | 6        |
| Sandiego               | Panama             | 2         | 6        |
| Sandiego (4)           | Reading            | 1         | 6        |
| Sandiego               | Muenchen           | 1         | 4        |
| Give (3)               | Urbana             | 0         | 6        |
| <b>Give (3)</b>        | <b>Give</b>        | <b>10</b> | <b>6</b> |
| Give                   | Miami              | 0         | 5        |
| <b>Rubislaw</b>        | <b>Rubislaw</b>    | <b>0</b>  | <b>6</b> |
| Rubislaw               | Panama             | 1         | 4        |

Non-top 40

|                      |                 |          |          |
|----------------------|-----------------|----------|----------|
| Abaeletuba (2)       | Gaminara        | 10       | 6        |
| Aberdeen (7)         | Paratyphi B     | 0        | 6        |
| <b>Adelaide</b>      | <b>Adelaide</b> | <b>0</b> | <b>6</b> |
| Aequatoria           | Rissen          | 0        | 3        |
| Alachua              | Senftenberg     | 0        | 5        |
| <b>Albany (2)</b>    | <b>Albany</b>   | <b>0</b> | <b>6</b> |
| Amager               | Anatum          | 1        | 6        |
| Amersfoort           | Give            | 10       | 6        |
| Amsterdam            | Mbandaka        | 1        | 4        |
| Amsterdam (2)        | Pomona          | 0        | 4        |
| Astridplein          | Anatum          | 1        | 6        |
| Athinai              | Senftenberg     | 0        | 4        |
| Augustenberg         | Dublin          | 2        | 4        |
| Augustenborg         | Newport         | 1        | 4        |
| Bahrenfeld           | Urbana          | 0        | 5        |
| Bangui               | Adelaide        | 0        | 2        |
| Bardo (2)            | Newport         | 0        | 6        |
| Benfica              | Paratyphi B     | 0        | 6        |
| Blockley             | Choleraesuis    | 3        | 5        |
| <b>Blockley (3)</b>  | <b>Blockley</b> | <b>1</b> | <b>6</b> |
| Bovismorbificans     | Derby           | 3        | 4        |
| Bovismorbificans (3) | Anatum          | 1        | 5        |
| Brancaster           | Senftenberg     | 0        | 5        |
| Bredeney             | Rubislaw        | 0        | 5        |
| Brunei (6)           | Hadar           | 1        | 5        |
| Butantan             | Sendai          | 2        | 4        |
| Butantan             | Gaminara        | 10       | 5        |
| Cannstatt            | Give            | 10       | 5        |
| Caracas (3)          | Urbana          | 0        | 5        |
| Carrau               | Urbana          | 0        | 5        |
| Cerro                | Albany          | 4        | 4        |
| Cerro                | Typhisuis       | 1        | 4        |
| Cerro var. O 14+     | Sendai          | 2        | 4        |
| Cerro var. O 14+     | Typhisuis       | 1        | 4        |
| Chailey              | Hadar           | 1        | 6        |

|                      |                 |           |          |
|----------------------|-----------------|-----------|----------|
| Champaign            | Sloterdijk      | 1         | 5        |
| <b>Chester (2)</b>   | <b>Chester</b>  | <b>1</b>  | <b>6</b> |
| Chicago              | Cerro           | 0         | 5        |
| Coleypark            | Anatum          | 1         | 6        |
| Coleypark            | Sloterdijk      | 1         | 6        |
| Corvallis (4)        | Newport         | 0         | 4        |
| Cubana (6)           | Senftenberg     | 0         | 4        |
| Denver               | Enteritidis     | 1         | 3        |
| Duesseldorf          | Albany          | 0         | 6        |
| Eastbourne (2)       | Rubislaw        | 0         | 1        |
| <b>Emek (2)</b>      | <b>Emek</b>     | <b>0</b>  | <b>6</b> |
| Freetown (2)         | Miami           | 0         | 5        |
| Fresno               | Paratyphi       | 1         | 6        |
| Fulica               | Subspecies II   | 0         | 5        |
| <b>Gaminara (6)</b>  | <b>Gaminara</b> | <b>10</b> | <b>6</b> |
| Giza                 | Hadar           | 1         | 5        |
| Goulfy               | Muenchen        | 0         | 5        |
| Gozo                 | 4,5,12, i-      | 1         | 6        |
| Group V antisera HME | Anatum          | 1         | 4        |
| Hato                 | Agona           | 1         | 6        |
| Havana               | Pomona          | 2         | 3        |
| Havana (2)           | Wien            | 0         | 4        |
| Hermannswerder       | Pomona          | 0         | 4        |
| Hidalgo              | Pomona          | 0         | 6        |
| Hindmarsh            | Anatum          | 1         | 5        |
| Hvittingfoss         | Derby           | 1         | 4        |
| Hvittingfoss         | Muenchen        | 1         | 4        |
| Hvittingfoss (3)     | Paratyphi B     | 0         | 6        |
| I 47:z4,z23          | Newport         | 0         | 4        |
| I 47:zy:z23          | Newport         | 0         | 4        |
| I 9,12: l,z28        | Javiana         | 1         | 6        |
| Idikan               | Worthington     | 3         | 5        |
| Idikan (2)           | Derby           | 0         | 5        |
| Isangi               | Dublin          | 0         | 4        |
| Kedougou             | Derby           | 0         | 4        |
| Kentucky             | Senftenberg     | 0         | 5        |
| Kentucky             | 4,5,12,i-       | 1         | 6        |
| <b>Kentucky (2)</b>  | <b>Kentucky</b> | <b>0</b>  | <b>6</b> |
| Kentucky (3)         | Anatum          | 1         | 5        |
| Kiambu               | Sendai          | 2         | 4        |
| Kirkee               | Pomona          | 0         | 4        |
| Kottbus (2)          | Mbandaka        | 1         | 5        |
| Koumra               | Urbana          | 0         | 5        |
| Kumasi               | Miami           | 0         | 4        |
| Lansing (2)          | Anatum          | 1         | 6        |
| LaRochelle           | Newport         | 0         | 6        |
| Lexington            | Newport         | 0         | 3        |
| Lexington (6)        | Sendai          | 2         | 4        |

|                      |                  |           |          |
|----------------------|------------------|-----------|----------|
| Lexington var O15+   | Newport          | 0         | 3        |
| Lille                | Albany           | 0         | 3        |
| Liverpool            | Adelaide         | 2         | 3        |
| Liverpool            | Reading          | 1         | 3        |
| Livingstone          | Senftenberg      | 0         | 5        |
| Livingstone var O14+ | Heidelberg       | 2         | 6        |
| Llandoff (3)         | Enteritidis      | 0         | 5        |
| <b>London</b>        | <b>London</b>    | <b>1</b>  | <b>6</b> |
| London               | Paratyphi B      | 1         | 6        |
| London (2)           | Stanley          | 1         | 6        |
| Madelia              | Miami            | 1         | 5        |
| Madelia              | Urbana           | 0         | 5        |
| Magwa                | Worthington      | 2         | 6        |
| Matopeni             | Albany           | 4         | 4        |
| Matopeni             | Muenchen         | 4         | 4        |
| Meleagridis (3)      | Gallinarum       | 5         | 5        |
| Mgulani              | Muenchen         | 1         | 4        |
| Mgulani (2)          | Dublin           | 2         | 4        |
| Michigan             | Mbandaka         | 5         | 5        |
| Michigan             | Paratyphi B      | 0         | 5        |
| <b>Minnesota</b>     | <b>Minnesota</b> | <b>10</b> | <b>6</b> |
| Minnesota            | Thompson         | 1         | 6        |
| Muenster             | Gaminara         | 10        | 6        |
| Muenster (2)         | Give             | 10        | 6        |
| Nessziona            | Gallinarum       | 3         | 4        |
| Nordrhein            | Newport          | 0         | 4        |
| Ohio (4)             | Lac-             | 2         | 5        |
| Onderstepoort        | Urbana           | 0         | 5        |
| Orientalis           | Muenchen         | 0         | 4        |
| Orion                | Sendai           | 2         | 4        |
| Orion                | Bareilly         | 0         | 6        |
| Orion var 15+ 34+    | Infantis         | 0         | 6        |
| Oslo                 | Enteritidis      | 1         | 5        |
| Oslo                 | Newport          | 0         | 6        |
| Oslo (2)             | Paratyphi A      | 1         | 5        |
| Othmarschen          | Montevideo       | 2         | 6        |
| Oukam                | Enteritidis      | 0         | 5        |
| <b>Pomona (2)</b>    | <b>Pomona</b>    | <b>0</b>  | <b>6</b> |
| Potsdam              | Paratyphi        | 2         | 6        |
| Potsdam (4)          | Muenchen         | 3         | 5        |
| Richmond (2)         | Bareilly         | 0         | 6        |
| Rideau               | Wien             | 0         | 6        |
| <b>Rissen (7)</b>    | <b>Rissen</b>    | <b>0</b>  | <b>6</b> |
| Rutgers (Give)       | Urbana           | 0         | 6        |
| Santiago             | Typhisuis        | 1         | 5        |
| Singapore            | Muenchen         | 1         | 6        |
| Sundsvall            | Wien             | 15        | 4        |
| Sundsvall            | Paratyphi B      | 0         | 6        |

|                     |                |          |          |
|---------------------|----------------|----------|----------|
| Teko                | Wien           | 4        | 4        |
| Telaviv             | Indiana        | 0        | 4        |
| Telhashomer         | Sloterdijk     | 1        | 4        |
| Tennessee (3)       | Lac-           | 1        | 6        |
| Tuscon              | Urbana         | 0        | 5        |
| Uganda var O15+ (2) | Stanley        | 1        | 4        |
| Urbana              | Reading        | 1        | 5        |
| Urbana              | Rubislaw       | 0        | 5        |
| <b>Virchow (3)</b>  | <b>Virchow</b> | <b>1</b> | <b>6</b> |
| Vitkin              | Sendai         | 2        | 4        |
| Wandsworth          | Choleraesuis   | 1        | 3        |
| Wandsworth (2)      | Typhisius      | 3        | 4        |
| Warragul            | Sendai         | 4        | 3        |
| Weltevreden (7)     | Mbandaka       | 1        | 6        |
| Wentworth           | Paratyphi B    | 0        | 6        |
| Yeene               | Sloterdijk     | 1        | 5        |

Non-subspecies I

|          |            |   |   |
|----------|------------|---|---|
| II (4)   | Salamae    | 0 | 6 |
| IIIa (2) | Arizonae   | 0 | 6 |
| IIIb (7) | Diarizonae | 0 | 5 |
| IV (8)   | Houtenae   | 0 | 6 |
| VI       | Indica     | 0 | 4 |

<sup>a</sup>Serovars in bold were concordant.

Table S1. List of all *S. enterica* serovars studied and related PCR-MS identifications<sup>a</sup>.
